# Supplementary material for: Theoretical studies on charge transport and optical properties of tris(N-saclicylideneanilines)
Source: Royal Society of Chemistry journal article supplement (doi:10.1039/c4ra01372g), 2014-01-01
Supplement: c4ra01372g1.pdf [file c4ra01372g1.pdf]

**Supplementary Information**

**Theoretical Studies on Charge Transport and Optical Properties of**

**Tris(N-salicylideneanilines)**

**R. Nithya and K. Senthilkumar**

Department of Physics, Bharathiar University, Coimbatore, India-641 046.

**Table S1** The effective charge transfer integral ( $J_{eff}$  in eV) for hole and electron transport of Tris(N-saclicyldeneanilines).

| Stacking angle | TSAN1 |          | TSAN2 |          | TSAN3 |          | TSAN4 |          | TSAN5 |          | TSAN6 |          |
|----------------|-------|----------|-------|----------|-------|----------|-------|----------|-------|----------|-------|----------|
|                | Hole  | Electron |
| 15             | 0.16  | 0.25     | 0.17  | 0.25     | 0.19  | 0.24     | 0.18  | 0.25     | 0.16  | 0.26     | 0.18  | 0.27     |
| 30             | 0.11  | 0.11     | 0.09  | 0.13     | 0.10  | 0.12     | 0.09  | 0.13     | 0.15  | 0.14     | 0.11  | 0.12     |
| 45             | 0.05  | 0.05     | 0.02  | 0.09     | 0.07  | 0.08     | 0.05  | 0.09     | 0.05  | 0.09     | 0.06  | 0.08     |
| 60             | 0.04  | 0.03     | 0.04  | 0.09     | 0.05  | 0.10     | 0.01  | 0.08     | 0.03  | 0.09     | 0.03  | 0.11     |
| 75             | 0.02  | 0.01     | 0.06  | 0.09     | 0.03  | 0.14     | 0.01  | 0.08     | 0.00  | 0.20     | 0.00  | 0.15     |
| 90             | 0.002 | 0.07     | 0.10  | 0.13     | 0.01  | 0.15     | 0.06  | 0.12     | 0.05  | 0.13     | 0.04  | 0.17     |

**Table S2** The site energy ( $\mathcal{E}$  in eV) for (a) hole and (b) electron transport of Tris(N-salicylideneanilines).

**(a) Hole Transport**

| Stacking angle | TSAN1           |                 | TSAN2           |                 | TSAN3           |                 | TSAN4           |                 | TSAN5           |                 | TSAN6           |                 |
|----------------|-----------------|-----------------|-----------------|-----------------|-----------------|-----------------|-----------------|-----------------|-----------------|-----------------|-----------------|-----------------|
|                | $\mathcal{E}_1$ | $\mathcal{E}_2$ |
| 15             | -5.10           | -4.83           | -4.45           | -4.42           | -4.45           | -4.40           | -4.44           | -4.43           | -4.65           | -4.87           | -4.59           | -4.81           |
| 30             | -5.06           | -4.88           | -4.47           | -4.54           | -4.47           | -4.53           | -4.52           | -4.50           | -4.84           | -4.95           | -4.73           | -4.84           |
| 45             | -4.77           | -4.62           | -4.50           | -4.57           | -4.49           | -4.55           | -4.56           | -4.51           | -4.86           | -4.92           | -4.79           | -4.86           |
| 60             | -4.71           | -4.66           | -4.54           | -4.54           | -4.51           | -4.51           | -4.55           | -4.51           | -4.86           | -4.90           | -4.83           | -4.91           |
| 75             | -4.67           | -4.64           | -4.57           | -4.50           | -4.53           | -4.47           | -4.55           | -4.52           | -4.83           | -4.89           | -4.89           | -5.08           |
| 90             | -4.69           | -4.66           | -4.54           | -4.46           | -4.47           | -4.45           | -4.54           | -4.52           | -4.77           | -4.87           | -4.85           | -5.07           |

**(a) Electron Transport**

| Stacking angle | TSAN1           |                 | TSAN2           |                 | TSAN3           |                 | TSAN4           |                 | TSAN5           |                 | TSAN6           |                 |
|----------------|-----------------|-----------------|-----------------|-----------------|-----------------|-----------------|-----------------|-----------------|-----------------|-----------------|-----------------|-----------------|
|                | $\mathcal{E}_1$ | $\mathcal{E}_2$ |
| 15             | -2.20           | -2.17           | -2.43           | -2.38           | -2.45           | -2.42           | -2.39           | -2.41           | -2.65           | -2.77           | -2.58           | -2.75           |
| 30             | -2.16           | -2.14           | -2.43           | -2.44           | -2.46           | -2.49           | -2.42           | -2.47           | -2.76           | -2.80           | -2.66           | -2.76           |
| 45             | -2.30           | -2.24           | -2.44           | -2.47           | -2.46           | -2.51           | -2.45           | -2.47           | -2.77           | -2.80           | -2.70           | -2.76           |
| 60             | -2.28           | -2.26           | -2.46           | -2.46           | -2.47           | -2.48           | -2.45           | -2.44           | -2.75           | -2.78           | -2.73           | -2.73           |
| 75             | -2.24           | -2.23           | -2.47           | -2.45           | -2.48           | -2.46           | -2.48           | -2.45           | -2.72           | -2.79           | -2.80           | -2.90           |
| 90             | -2.20           | -2.21           | -2.44           | -2.44           | -2.46           | -2.45           | -2.50           | -2.45           | -2.67           | -2.79           | -2.78           | -2.87           |

**Table S3** Computed absorption wavelength (in nm), oscillator strength (in a.u) and orbital transitions of Tris(N-saclicylideneanilines) calculated at B3LYP/6-311G(d,p) and PBE0/6-311G(d,p) level of theories in gas phase.

| Molecule | B3LYP/<br>6-311G(d,p)                 |                        |      |      | PBE0/<br>6-311G(d,p)                  |                        |      |       |
|----------|---------------------------------------|------------------------|------|------|---------------------------------------|------------------------|------|-------|
|          | Orbital<br>Transitions <sup>(A)</sup> | $\lambda_{\text{abs}}$ |      | $f$  | Orbital<br>Transitions <sup>(A)</sup> | $\lambda_{\text{abs}}$ |      | $f$   |
|          |                                       | nm                     | eV   |      |                                       | nm                     | eV   |       |
| TSAN2    | H-1→L                                 | 420                    | 2.96 | 0.68 | H→L                                   | 400                    | 3.10 | 0.82  |
|          | H→L                                   | 420                    | 2.96 | 0.68 | H-1→L                                 | 400                    | 3.10 | 0.82  |
|          | H-1→L+1                               | 352                    | 3.52 | 0.74 | H-1→L+1                               | 336                    | 3.69 | 0.66  |
|          | H-1→L+2                               |                        |      |      | H→L+1                                 |                        |      |       |
|          | H-1→L+1                               | 352                    | 3.52 | 0.74 | H-1→L+1                               | 336                    | 3.69 | 0.66  |
|          | H→L+1                                 |                        |      |      | H→L+1                                 |                        |      |       |
| TSAN3    | H→L                                   | 427                    | 2.91 | 0.62 | H→L                                   | 408                    | 3.04 | 0.74  |
|          | H-1→L                                 | 419                    | 2.96 | 0.57 | H-1→L                                 | 398                    | 3.12 | 0.71  |
|          | H→L+1                                 | 374                    | 3.32 | 0.21 | H→L+1                                 | 355                    | 3.49 | 0.23  |
|          | H-2→L                                 | 367                    | 3.38 | 0.11 | H-2→L                                 | 346                    | 3.58 | 0.13  |
|          | H-1→L+1                               | 350                    | 3.54 | 0.60 | H-1→L+1                               | 335                    | 3.70 | 0.51  |
|          | H-1→L+2                               | 342                    | 3.63 | 0.53 | H-1→L+2                               | 326                    | 3.80 | 0.47  |
|          | H→L+2                                 | 323                    | 3.84 | 0.04 | H→L+2                                 | 311                    | 3.98 | 0.47  |
| TSAN4    | H→L                                   | 419                    | 2.96 | 0.65 | H→L                                   | 399                    | 3.10 | 0.79  |
|          | H-1→L                                 | 418                    | 2.97 | 0.63 | H-1→L                                 | 398                    | 3.11 | 0.76  |
|          | H-1→L+1                               | 351                    | 3.53 | 0.71 | H-1→L+1                               | 335                    | 3.70 | 0.64  |
|          | H→L+1                                 | 350                    | 3.54 | 0.68 | H→L+1                                 | 334                    | 3.71 | 0.62  |
| TSAN5    | H→L                                   | 414                    |      | 0.65 | H→L                                   | 395                    |      | 0.788 |
|          | H-1→L                                 | 414                    | 2.99 | 0.65 | H-1→L                                 | 394                    | 3.14 | 0.785 |
|          | H-1→L+1                               | 347                    | 3.58 | 0.70 | H-1→L+1                               | 331                    | 3.75 | 0.639 |
|          | H→L+2                                 |                        |      |      | H→L+2                                 |                        |      |       |
|          | H-1→L+2                               | 346                    |      | 0.70 | H-1→L+2                               | 331                    |      | 0.638 |
|          | H→L+1                                 |                        | 3.59 |      | H→L+1                                 |                        | 3.75 |       |
| TSAN6    | H→L                                   | 418                    | 2.97 | 0.58 | H→L                                   | 399                    | 3.11 | 0.70  |
|          | H-1→L                                 | 411                    | 3.01 | 0.59 | H-1→L                                 | 391                    | 3.17 | 0.72  |
|          | H→L+1                                 | 367                    | 3.38 | 0.21 | H→L+1                                 | 349                    | 3.56 | 0.22  |
|          | H-2→L                                 | 360                    | 3.44 | 0.10 | H-2→L                                 | 340                    | 3.64 | 0.07  |
|          | H-1→L+1                               | 344                    | 3.60 | 0.56 | H-6→L                                 | 338                    | 3.67 | 0.08  |
|          | H-1→L+2                               | 336                    | 3.69 | 0.52 | H-1→L+1                               | 329                    | 3.78 | 0.46  |
|          |                                       |                        |      |      | H-1→L+2                               | 321                    | 3.87 | 0.46  |

A: H and L represent HOMO and LUMO, respectively. The transitions with oscillator strength higher than 0.01 a.u. are given.

**Table S4** The selected geometrical parameters (bond length in Å, angle in degrees) of Tris(N-saclicylideneanilines) at TD-B3LYP/6-311G(d,p) level of theory in gas phase (For labeling of atoms see Figure S1)

| Parameters                       | TSAN2 | TSAN3 | TSAN4 | TSAN5 | TSAN6 |
|----------------------------------|-------|-------|-------|-------|-------|
| R <sub>1</sub> (N20-H25)         | 1.030 | 1.030 | 1.033 | 1.036 | 1.036 |
| R <sub>2</sub> (O24-H25)         | 1.790 | 1.781 | 1.756 | 1.720 | 1.726 |
| R <sub>3</sub> (O24-C23)         | 1.261 | 1.284 | 1.262 | 1.254 | 1.252 |
| R <sub>4</sub> (N20-C21)         | 1.348 | 1.349 | 1.343 | 1.385 | 1.383 |
| R <sub>5</sub> (C21-C22)         | 1.410 | 1.410 | 1.40  | 1.349 | 1.346 |
| R <sub>6</sub> (N20-C4)          | 1.389 | 1.388 | 1.393 | 1.359 | 1.358 |
| R <sub>7</sub> (C30-C29)         | 1.431 | 1.446 | 1.427 | 1.456 | 1.454 |
| R <sub>8</sub> (C22-C27)         | 1.432 | 1.433 | 1.436 | 1.50  | 1.508 |
| R <sub>9</sub> (C21-H26)         | 1.080 | 1.079 | 1.081 | 1.082 | 1.083 |
| R <sub>10</sub> (C1-O10)         | 1.367 | 1.367 | 1.360 | 1.333 | 1.331 |
| θ <sub>1</sub> (C21-N20-H25)     | 111.9 | 111.7 | 111.4 | 110.7 | 110.8 |
| θ <sub>2</sub> (N20-H25-O24)     | 137.6 | 137.7 | 138.5 | 138.9 | 138.4 |
| θ <sub>3</sub> (C21-N20-C4)      | 128.5 | 128.6 | 128.3 | 127.2 | 127.2 |
| θ <sub>4</sub> (C1-O10-C11)      | 117.8 | 117.8 | 118.2 | 114.6 | 114.6 |
| θ <sub>5</sub> (C55-N56-H57)     | 113.6 | 118.9 | 113.5 | 111.6 | 111.8 |
| Φ <sub>1</sub> (C3-C4-N20-H25)   | 0.0   | 0.0   | 0.0   | -1.84 | -0.06 |
| Φ <sub>2</sub> (C2-C1-O10-C11)   | 0.0   | 0.0   | 0.0   | -86.5 | -95.2 |
| Φ <sub>3</sub> (C30-C55-N56-H57) | 0.0   | 0.0   | 0.0   | -0.08 | 0.23  |

**Table S5** Computed emission wavelength (in nm) and oscillator strength (in a.u) corresponding to the electronic transition between HOMO and LUMO energy levels of Tris(N-saclicyldeneanilines) calculated at B3LYP/6-311G(d,p) and PBE0/6-311G(d,p) level of theories in gas phase.

| Molecule     | B3LYP/<br>6-311G(d,p)   |      |      | PBE0/<br>6-311G(d,p)    |      |      |
|--------------|-------------------------|------|------|-------------------------|------|------|
|              | $\lambda_{\text{emis}}$ |      | f    | $\lambda_{\text{emis}}$ |      | f    |
|              | nm                      | eV   |      | nm                      | eV   |      |
| <b>TSAN2</b> | 509                     | 2.44 | 0.39 | 477                     | 2.60 | 0.48 |
| <b>TSAN3</b> | 541                     | 2.29 | 0.25 | 503                     | 2.47 | 0.30 |
| <b>TSAN4</b> | 511                     | 2.43 | 0.36 | 478                     | 2.59 | 0.45 |
| <b>TSAN5</b> | 434                     | 2.85 | 0.79 | 415                     | 2.99 | 0.90 |
| <b>TSAN6</b> | 606                     | 2.05 | 0.20 | 557                     | 2.23 | 0.24 |

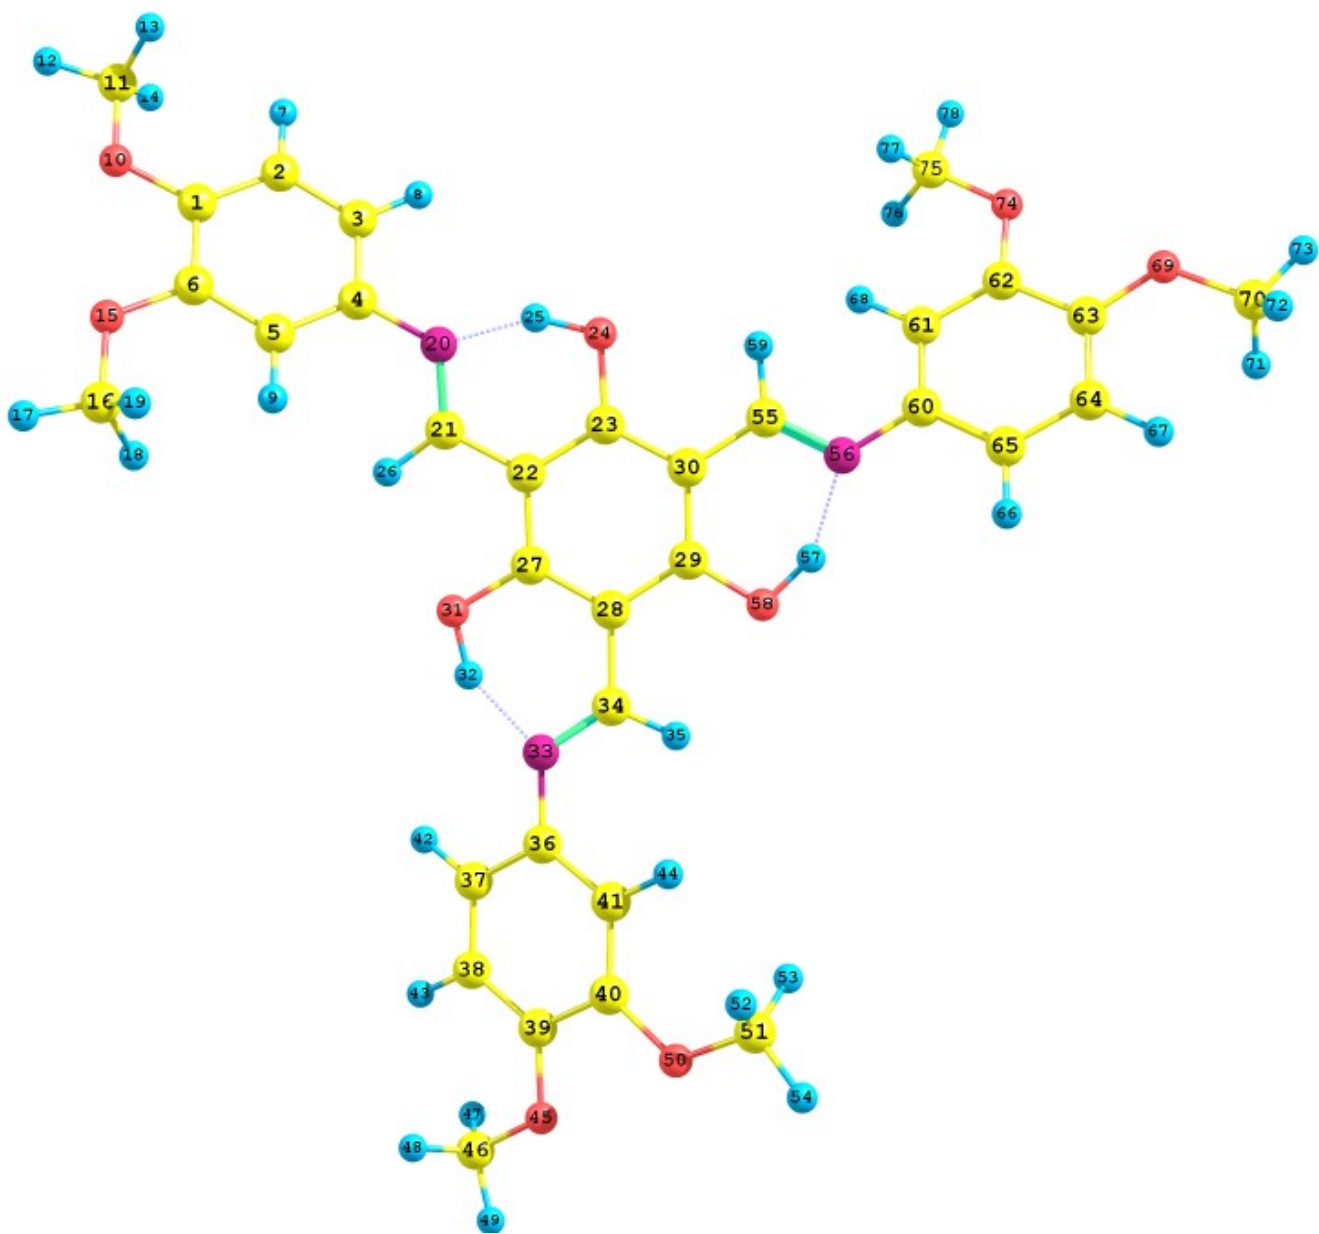

(a)

TSAN1

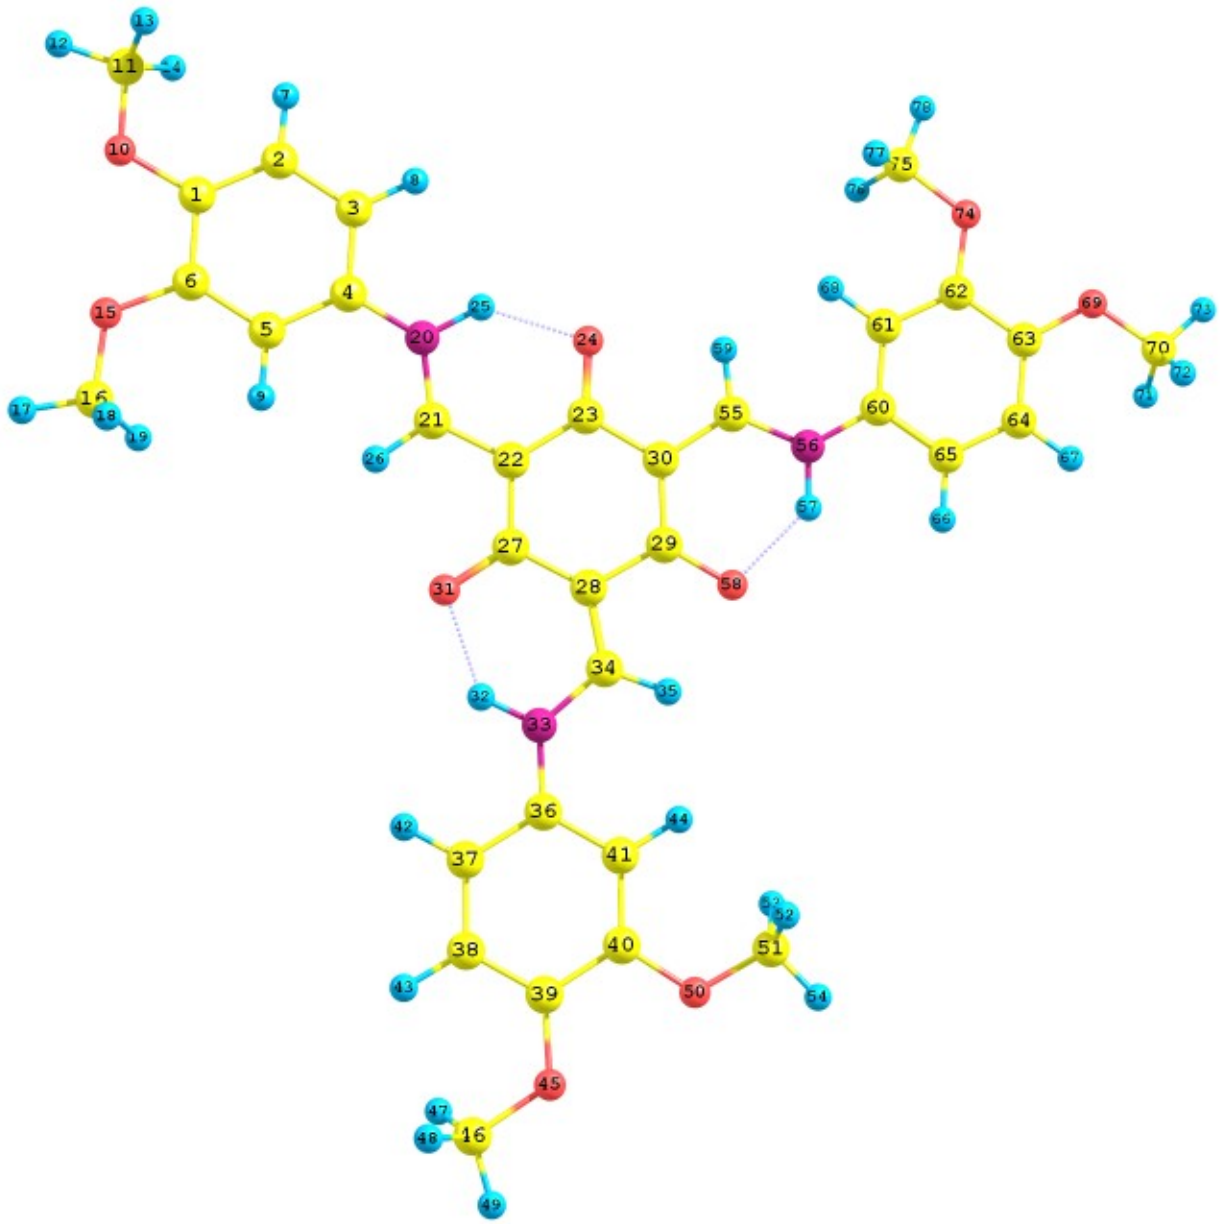

(b)

TSAN2



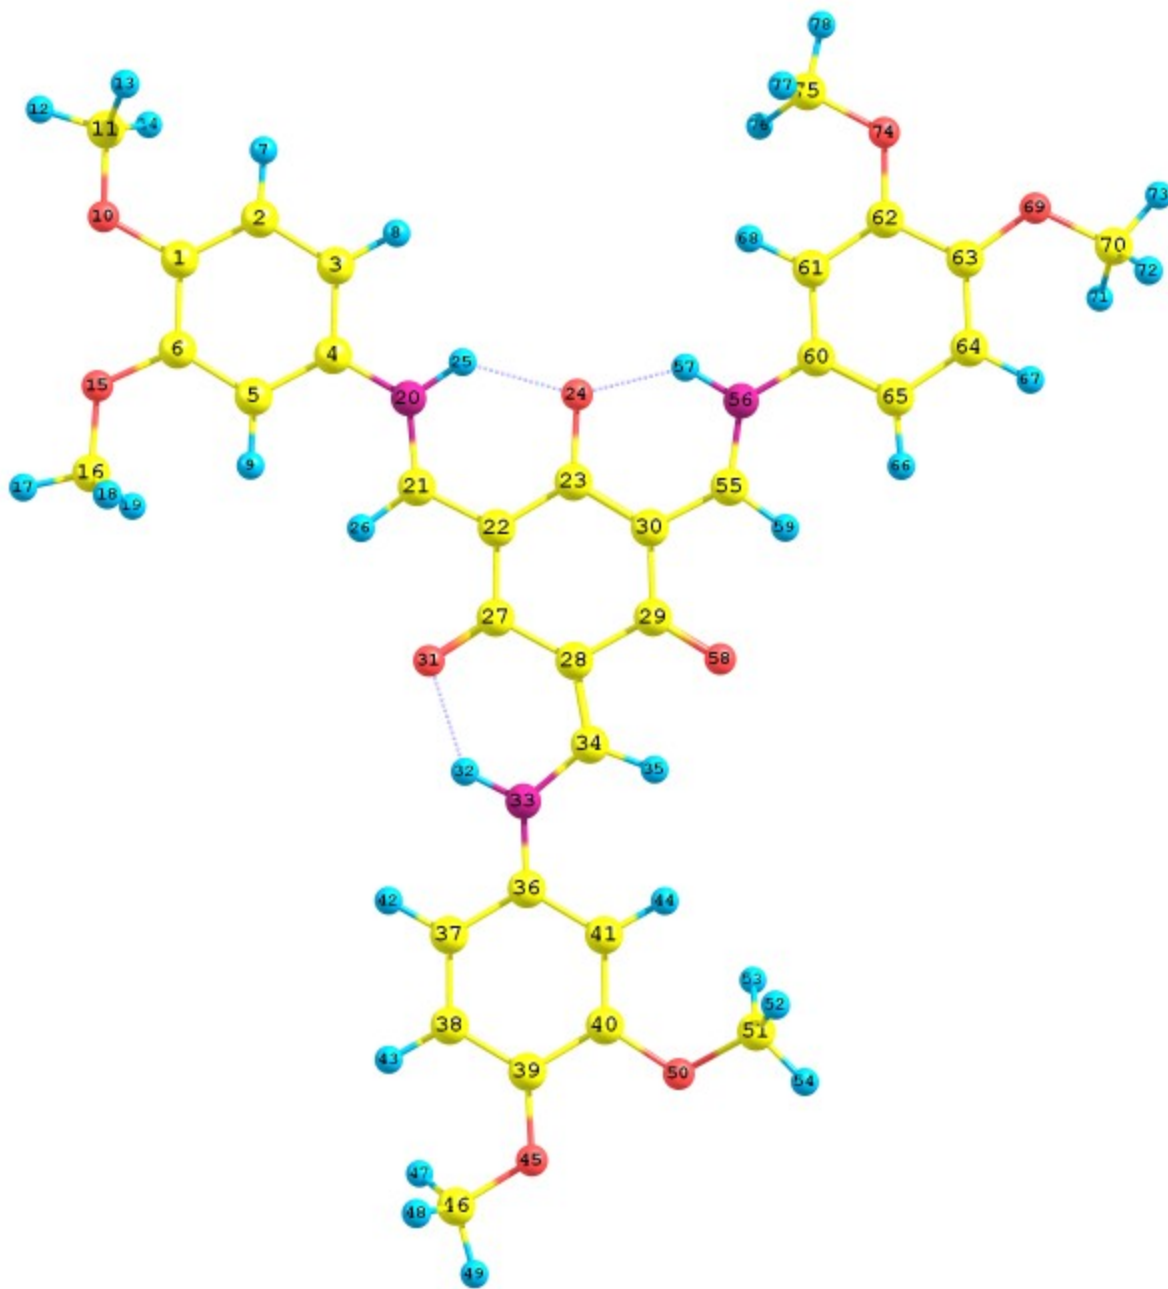

(c)

TSAN3

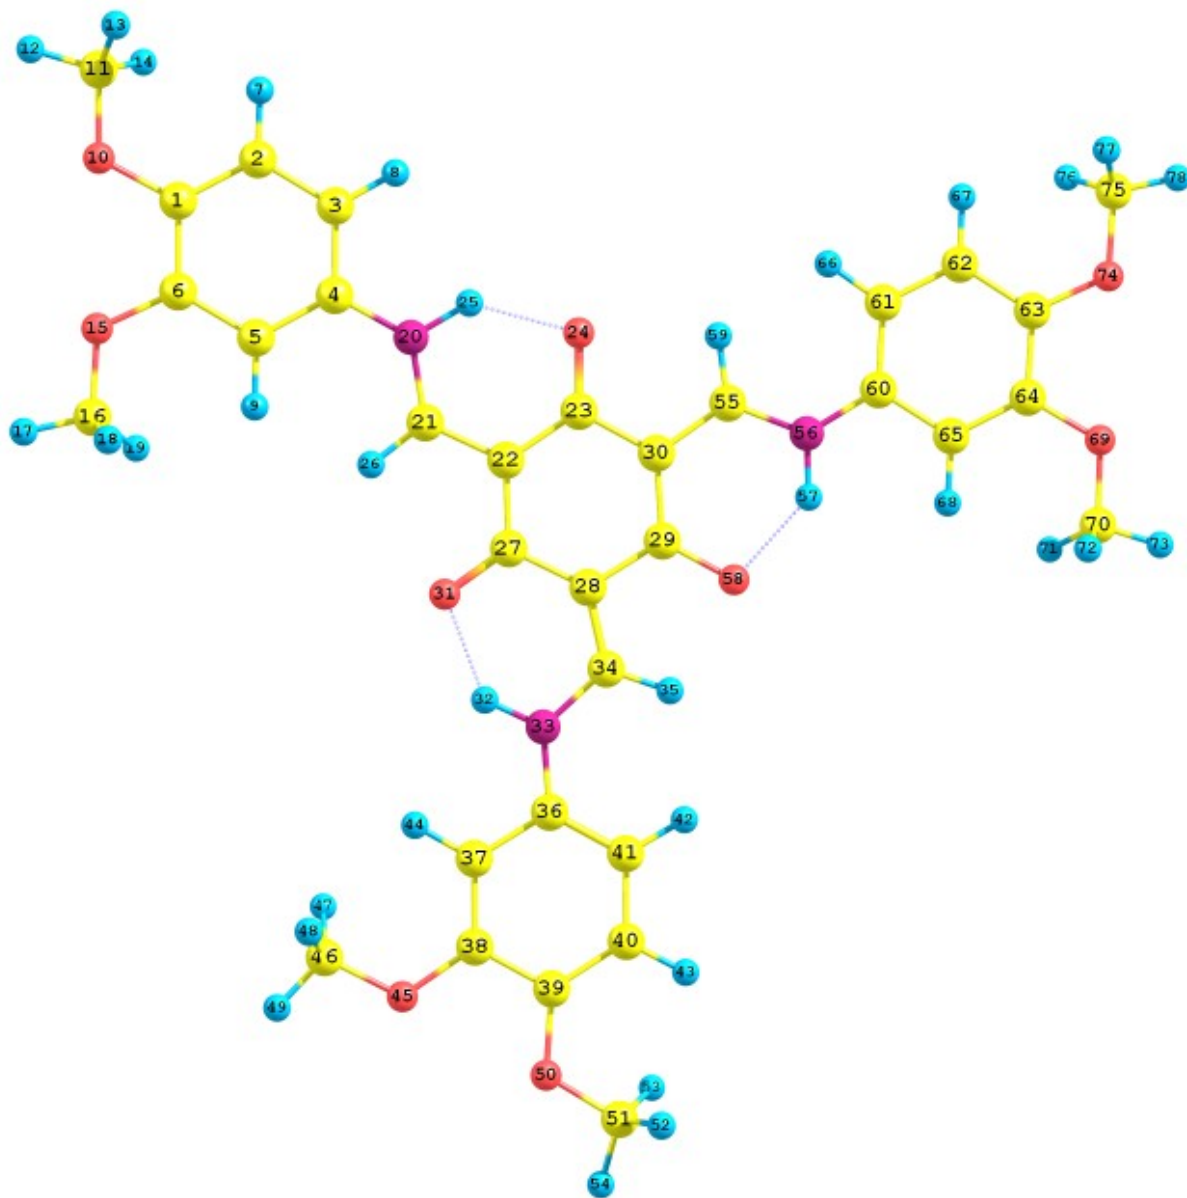

(d)

TSAN4

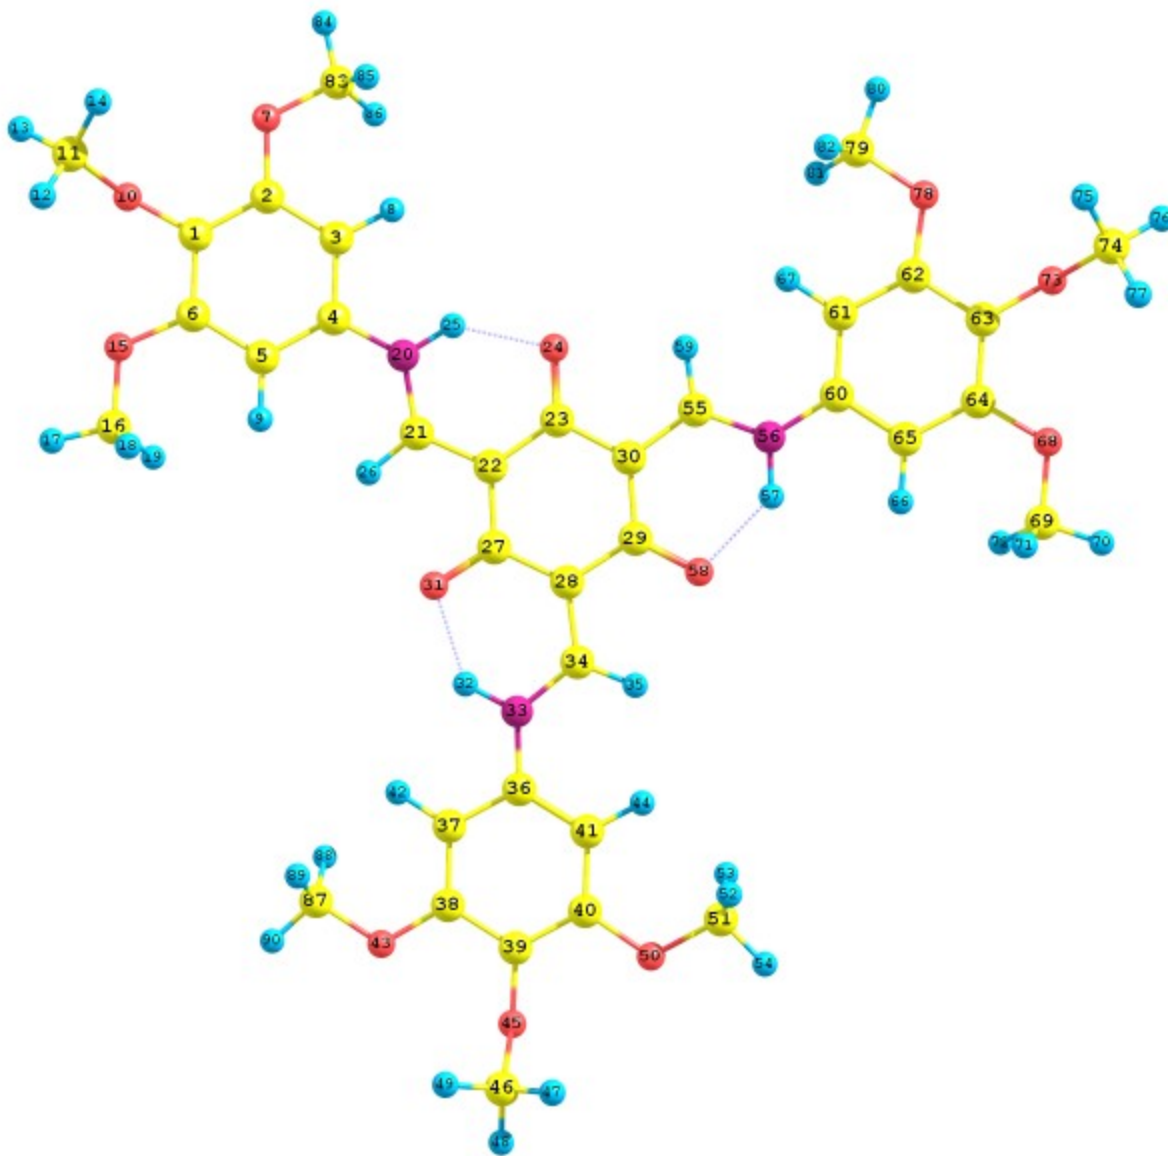

(e)

TSAN5

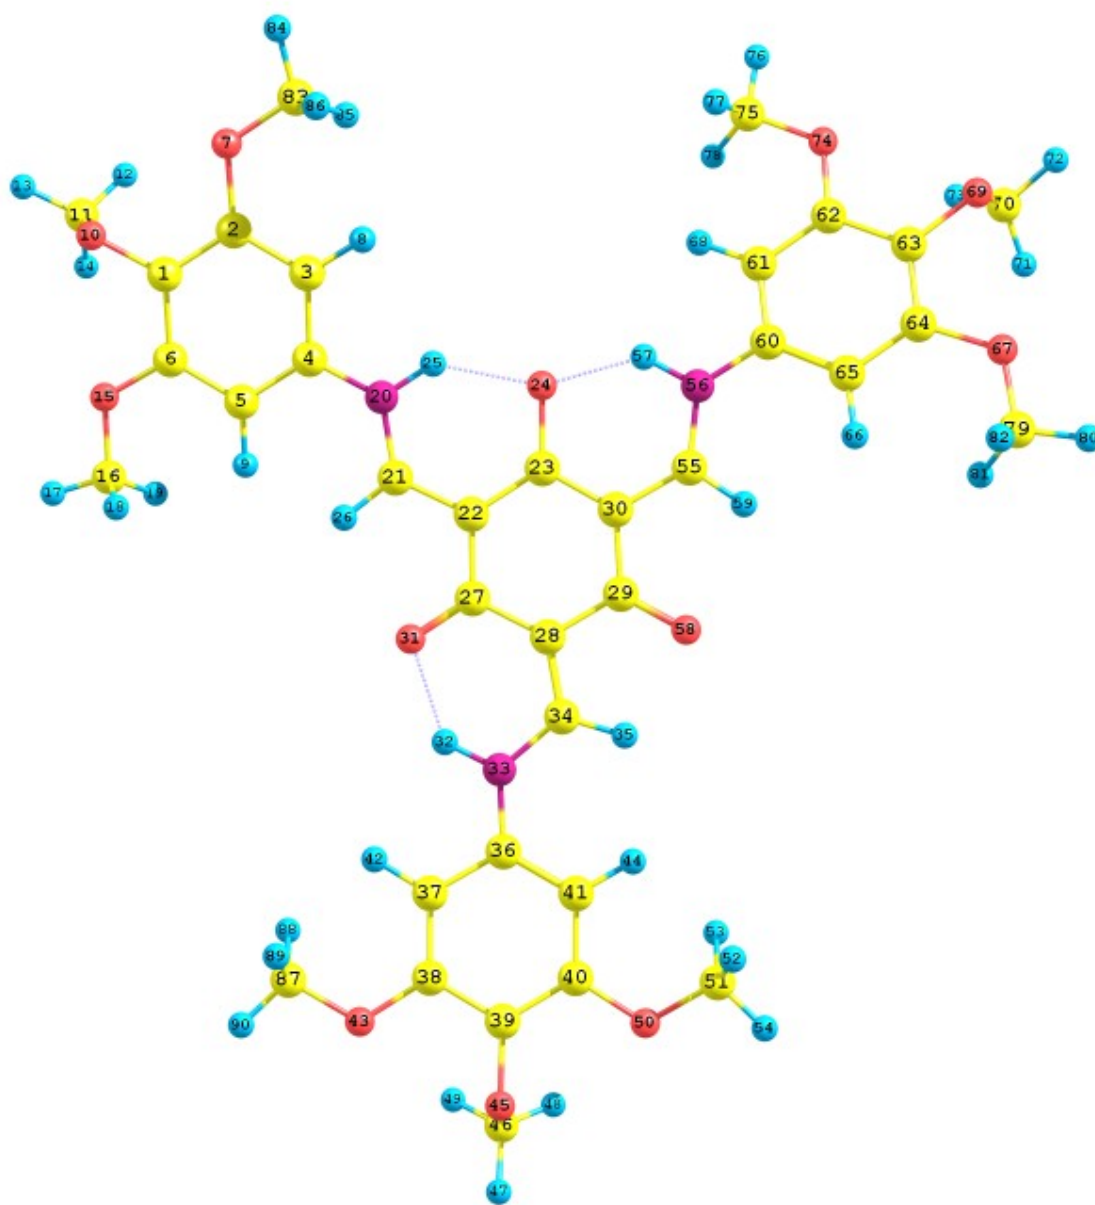

(f)

TSAN6

**Figure S1** The optimized geometries of Tris(N-saclicylideneanilines) at B3LYP/6-311G(d,p) level of theory

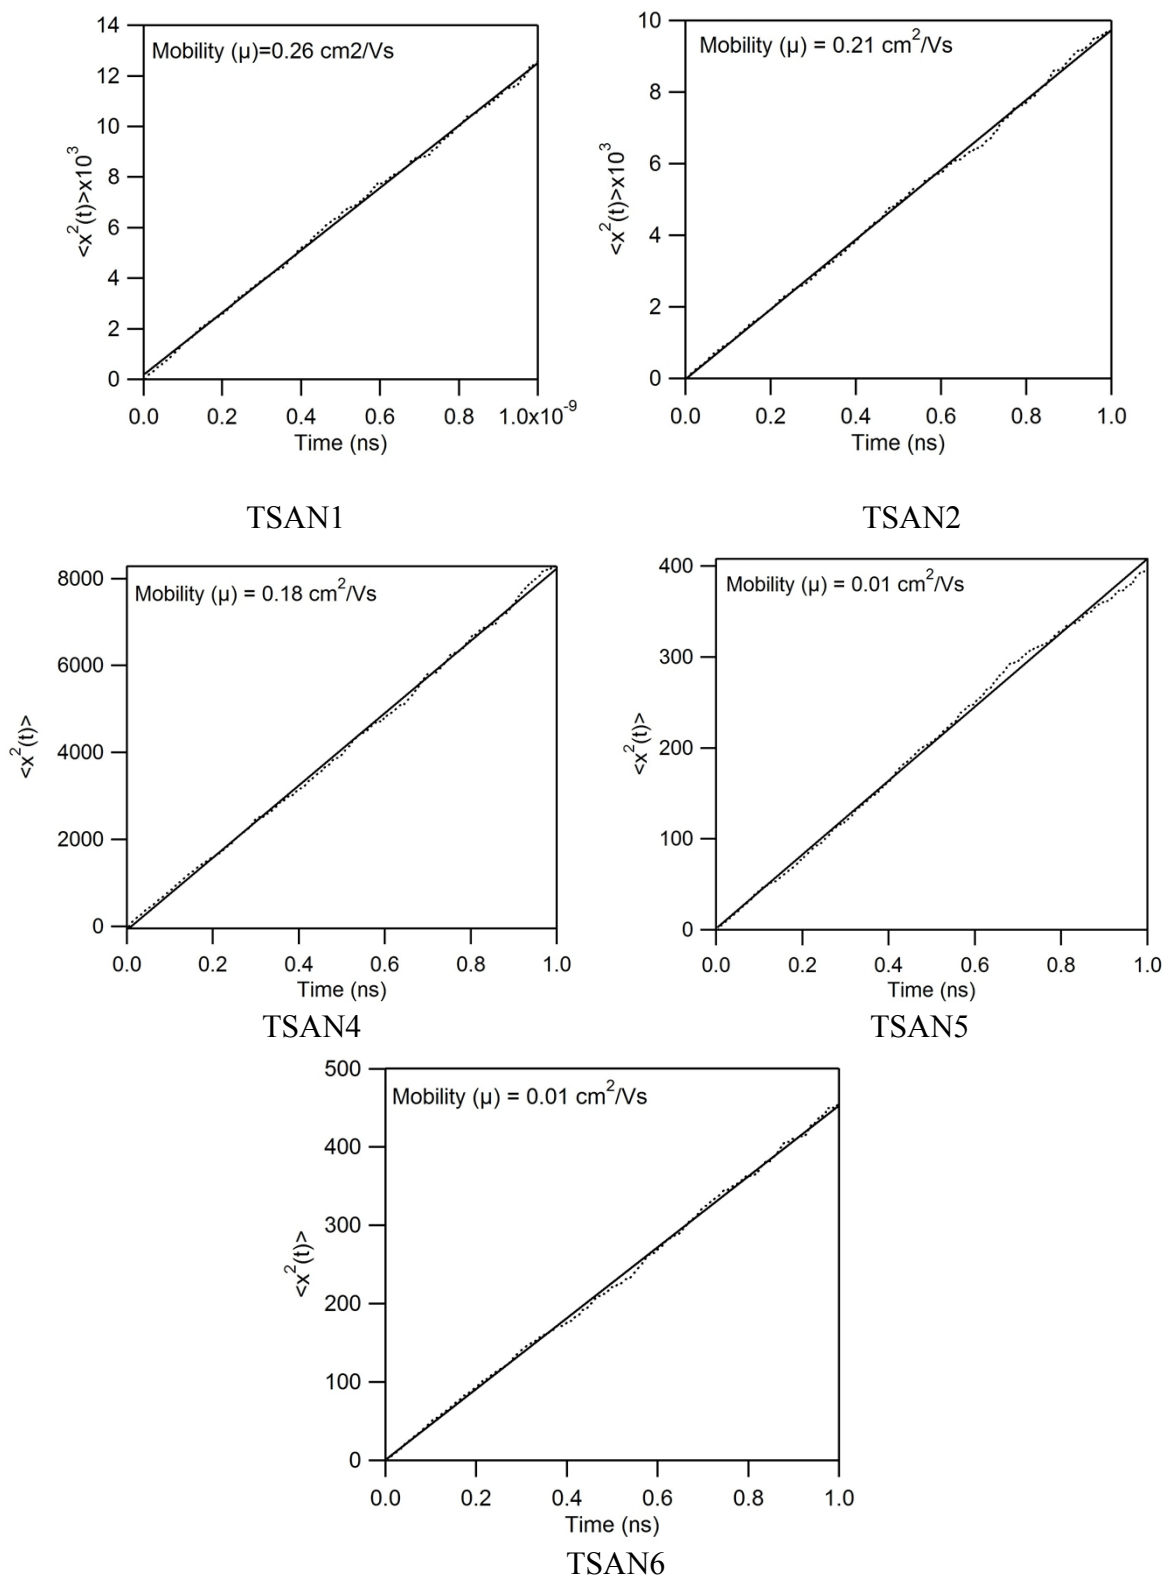

**Figure S2** The plot of mean-squared displacement of hole in the studied Tris(N-saclicylideneanilines) as a function of time.

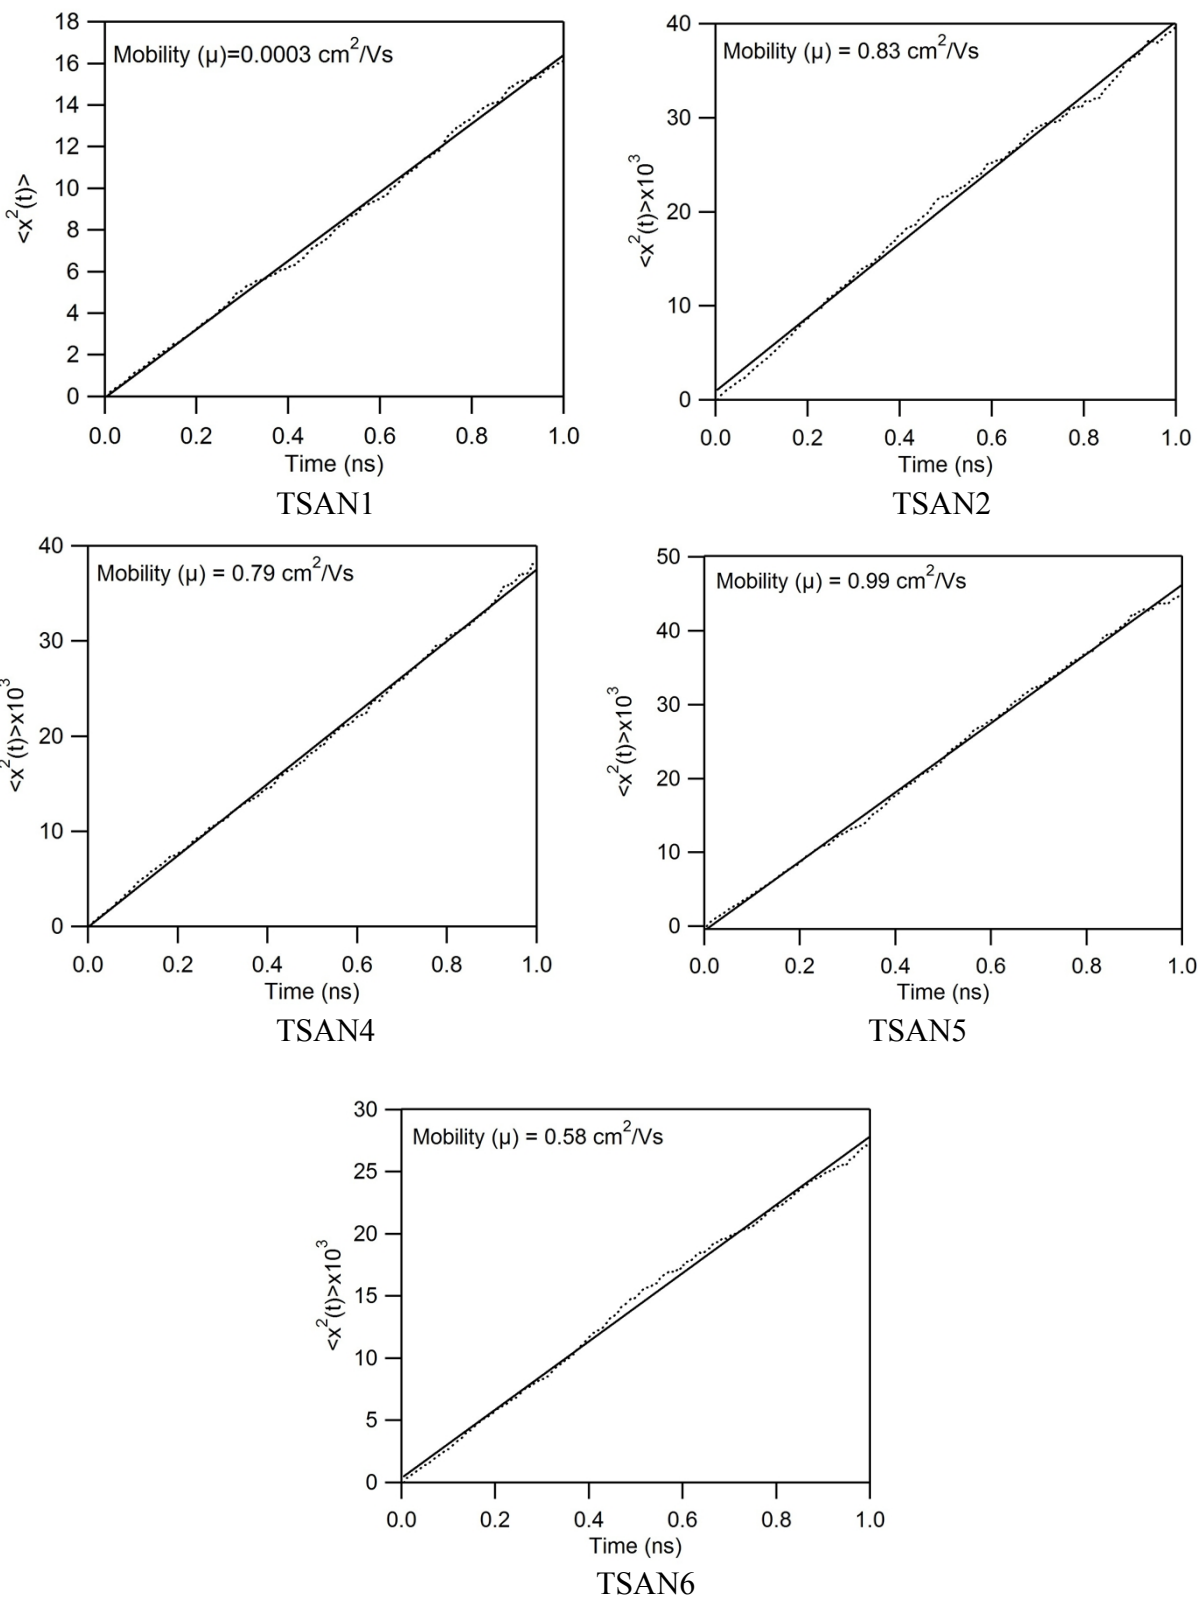

**Figure S3** The plot of mean-squared displacement of hole in the studied Tris(N-salicylideneanilines) as a function of time.
